# Supplementary material for: Metabolic Profiling of Chestnut Shell (Castanea crenata) Cultivars Using UPLC-QTOF-MS and Their Antioxidant Capacity
Source: MDPI journal article supplement (doi:10.3390/biom12121797), 2022-12-01
Supplement: s1 [file s1]

Table S1. Sample list of *C. crenata* analyzed in the present study.

| Region                                                    | Number of samples | Cultivar name | Origin | Crossbreeding                                                                                    |
|-----------------------------------------------------------|-------------------|---------------|--------|--------------------------------------------------------------------------------------------------|
|                                                           | 22                | Okkwang       | Korea  | <i>crenata</i> <sup>a</sup>                                                                      |
| Chungchengnam-do<br>(latitude 36° N,<br>Longitude 127° E) | 11                | Daebo         | Korea  | <i>crenata</i> hybrid<br>(Sangmyeon 1 <sup>a</sup> × Riheiguri)                                  |
|                                                           | 12                | Ishizuuchi    | Japan  | <i>crenata</i> hybrid<br>(Ganne <sup>b</sup> × Kasaharawase <sup>b</sup> )                       |
|                                                           | 15                | Porotan       | Japan  | ( <i>crenata</i> × <i>bungeana</i> ) × <i>crenata</i> hybrid<br>(550-40 × Tanzawa <sup>b</sup> ) |
|                                                           | 14                | Riheiguri     | Japan  | <i>crenata</i> × <i>mollissima</i> hybrid                                                        |

<sup>a</sup> The origin of cultivar was Korea only. <sup>b</sup> The origin of cultivar was Japan only.

Table S2. Retention times and MRM transitions of metabolites quantified from *C. crenata* shells by LC-QTRAP/MS.

| Compound                                         | Retention time (min) | Precursor ion ( <i>m/z</i> ) | Collision energy (eV) | MRM ion transitions ( <i>m/z</i> ) |
|--------------------------------------------------|----------------------|------------------------------|-----------------------|------------------------------------|
| Shikimic acid                                    | 0.99                 | 172.8                        | -20                   | 93.0                               |
| Gallic acid                                      | 3.88                 | 168.8                        | -23                   | 125.0                              |
| Tryptophan                                       | 4.59                 | 202.9                        | -24                   | 159.0                              |
| Chlorogenic acid                                 | 5.22                 | 353.1                        | -29                   | 191.0                              |
| Catechin                                         | 5.26                 | 288.9                        | -31                   | 245.0                              |
| Caffeic acid                                     | 5.62                 | 178.9                        | -25                   | 135.0                              |
| Rutin                                            | 5.98                 | 609.2                        | -62                   | 299.9                              |
| Quercetin glucose                                | 6.20                 | 463.1                        | -40                   | 300.0                              |
| Coumaric acid                                    | 6.24                 | 162.8                        | -22                   | 119.0                              |
| Ferulic acid                                     | 6.56                 | 192.9                        | -22                   | 134.0                              |
| Luteolin                                         | 7.67                 | 284.8                        | -55                   | 132.9                              |
| Quercetin                                        | 7.72                 | 300.9                        | -36                   | 150.9                              |
| Naringenin                                       | 8.25                 | 270.9                        | -34                   | 150.9                              |
| Apigenin                                         | 8.25                 | 268.9                        | -49                   | 116.9                              |
| Phenylalanine- <sup>13</sup> C <sub>6</sub> (IS) | 4.06                 | 169.9                        | -20                   | 153.2                              |

Table S3. The list of compounds in heatmap visualization.

| Group | Class                    | Compound                    | Comp no. |
|-------|--------------------------|-----------------------------|----------|
| 1     | Proanthocyanidins        | C-C-C B-type trimer         | 19       |
|       | Proanthocyanidins        | C(G)-C B-type dimer         | 20       |
|       | Ellagitannins            | galloyl-HHDP-glucose        | 2        |
|       | Flavonoids               | Luteolin                    | 33       |
|       | Flavonoids               | Kaempferol                  | 37       |
|       | Ellagic acid derivatives | Dimethylellagic acid        | 46       |
|       | Ellagic acid derivatives | Trimethylellagic acid       | 48       |
|       | Gallic acid derivetives  | Tetragalloyl glucose        | 55       |
|       | Flavonoids               | Quercetin                   | 34       |
|       | Flavonoids               | Isorhamnetin                | 40       |
| 2     | Flavonoids               | Naringin                    | 38       |
|       | Flavonoids               | Kaempferol-rutinoside       | 32       |
|       | Flavonoids               | Kaempferol coumaroyl hexose | 35       |
|       | Ellagitannins            | Trigalloyl-HHDP-glucose     | 9        |
|       | Gallic acid derivetives  | Digalloyl glucose           | 52       |
|       | Ellagitannins            | Digalloyl-HHDP-glucose      | 8        |
|       | Gallic acid derivetives  | Trigalloyl glucose          | 54       |
|       | Ellagic acid derivatives | Ellagic acid deoxyhexose    | 43       |
|       | Flavonoids               | Rutin                       | 27       |
|       | Flavonoids               | Apigenin                    | 39       |
|       | Ellagic acid derivatives | Ellagic acid hexose         | 41       |
|       | Ellagic acid derivatives | Ellagic acid pentose        | 42       |
|       | Ellagitannins            | Bis-HHDP-glucose            | 5        |
|       | Ellagitannins            | HHDP-valoneoyl-glucose      | 6        |
|       | Ellagitannins            | HHDP-glucose                | 1        |
|       | Ellagitannins            | NHTP-HHDP-glucose           | 3        |
| 3     | Proanthocyanidins        | C-C B-type dimer            | 18       |
|       | Flavonoids               | Catechin                    | 25       |
|       | Phenolic acid            | Salicylic acid              | 71       |
|       | Flavonoids               | Eriodictyol                 | 36       |
|       | Phenolic acid            | Phlorethin                  | 73       |
|       | Flavonoids               | Epigallocatechin            | 24       |
|       | Proanthocyanidins        | GC-GC-C B-type trimer       | 11       |
|       | Proanthocyanidins        | GC-GC B-type dimer          | 14       |
|       | Flavonoids               | Naringenin glucoside        | 30       |
|       | Flavonoids               | Narigenin                   | 31       |
|       | Flavonoids               | Myricetin-hexoside          | 26       |

|   |  |                          |                        |    |
|---|--|--------------------------|------------------------|----|
| 4 |  | Flavonoids               | Quercetin hexose       | 28 |
|   |  | Organic acids            | Citric acid            | 66 |
|   |  | Phenolic acid            | Quinic acid            | 70 |
|   |  | Amino acids              | Phenylalanine          | 63 |
|   |  | Amino acids              | Tryptophan             | 64 |
|   |  | Phenolic acid            | Ferulic acid           | 72 |
|   |  | Gallic acid derivatives  | Galloylglucose         | 49 |
|   |  | Gallic acid derivatives  | Gallic acid            | 50 |
|   |  | Amino acids              | Glutamate              | 60 |
|   |  | Organic acids            | Malic acid             | 67 |
|   |  | Amino acids              | Arginine               | 58 |
|   |  | Amino acids              | Asparagin              | 57 |
|   |  | Amino acids              | Proline                | 59 |
|   |  | Amino acids              | Betaine                | 61 |
|   |  | Amino acids              | Glutamine              | 62 |
|   |  | Ellagic acid derivatives | Ellagic acid           | 44 |
|   |  | Organic acids            | Fumaric acid           | 65 |
|   |  | Phenolic acid            | Coumaric acid          | 68 |
|   |  | Phenolic acid            | Caffeic acid           | 69 |
|   |  | Ellagic acid derivatives | Methylellagic acid     | 45 |
|   |  | Proanthocyanidins        | GC-GC-GC B-type trimer | 16 |
|   |  | Flavonoids               | Myricetin              | 29 |

Table S4. LC-QTRAP/MS-MRM calibration curve equations and linear correlation coefficients ( $R^2$ ) for metabolites quantified in *C. crenata* shells.

| Compounds                | Con. range (nmol/L) | Calibration equations  | $R^2$  |
|--------------------------|---------------------|------------------------|--------|
| Shikimic acid            | 10-1000             | $y = 0.0401x - 0.8948$ | 0.9965 |
| Gallic acid <sup>a</sup> | 6-600               | $y = 3.837x + 8.185$   | 0.9973 |
| Tryptophan <sup>a</sup>  | 0.05-10             | $y = 4.652x + 1.941$   | 0.9944 |
| Chlorogenic acid         | 0.5-50              | $y = 2.052x - 0.6847$  | 0.9953 |
| Catechin <sup>a</sup>    | 0.15-15             | $y = 3.014x + 1.604$   | 0.9970 |
| Caffeic acid             | 0.3-30              | $y = 1.821x + 2.451$   | 0.9941 |
| Rutin                    | 10-1000             | $y = 1.603x + 1.490$   | 0.9911 |
| Quercetin glucose        | 2-200               | $y = 1.235x + 3.106$   | 0.9988 |
| Coumaric acid            | 10-1000             | $y = 1.615x + 0.0554$  | 0.9987 |
| Ferulic acid             | 6-600               | $y = 0.3190x - 1.203$  | 0.9919 |
| Luteolin                 | 10-1000             | $y = 1.975x + 3.053$   | 0.9957 |
| Quercetin <sup>a</sup>   | 0.1-10              | $y = 7.119x + 0.3907$  | 0.9978 |
| Naringenin               | 10-1000             | $y = 3.581x + 0.0042$  | 0.9995 |
| Apigenin                 | 1.5-150             | $y = 1.674x - 0.5507$  | 0.9973 |

<sup>a</sup> The concentration is  $\mu\text{mol/L}$ .

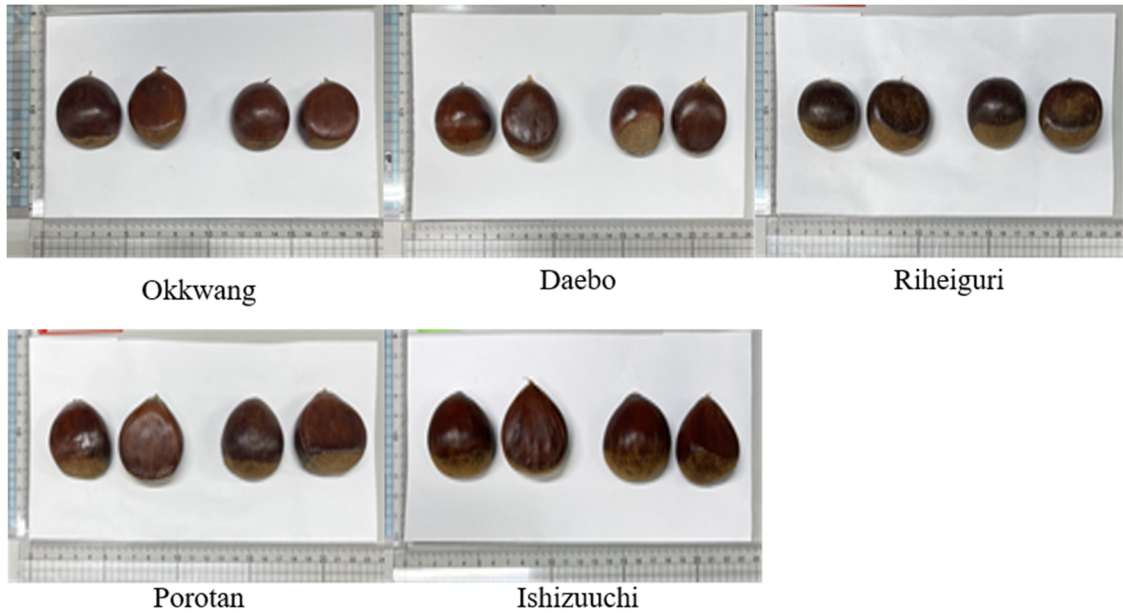

Figure S1. Morphological features of five *C. crenata* cultivars.

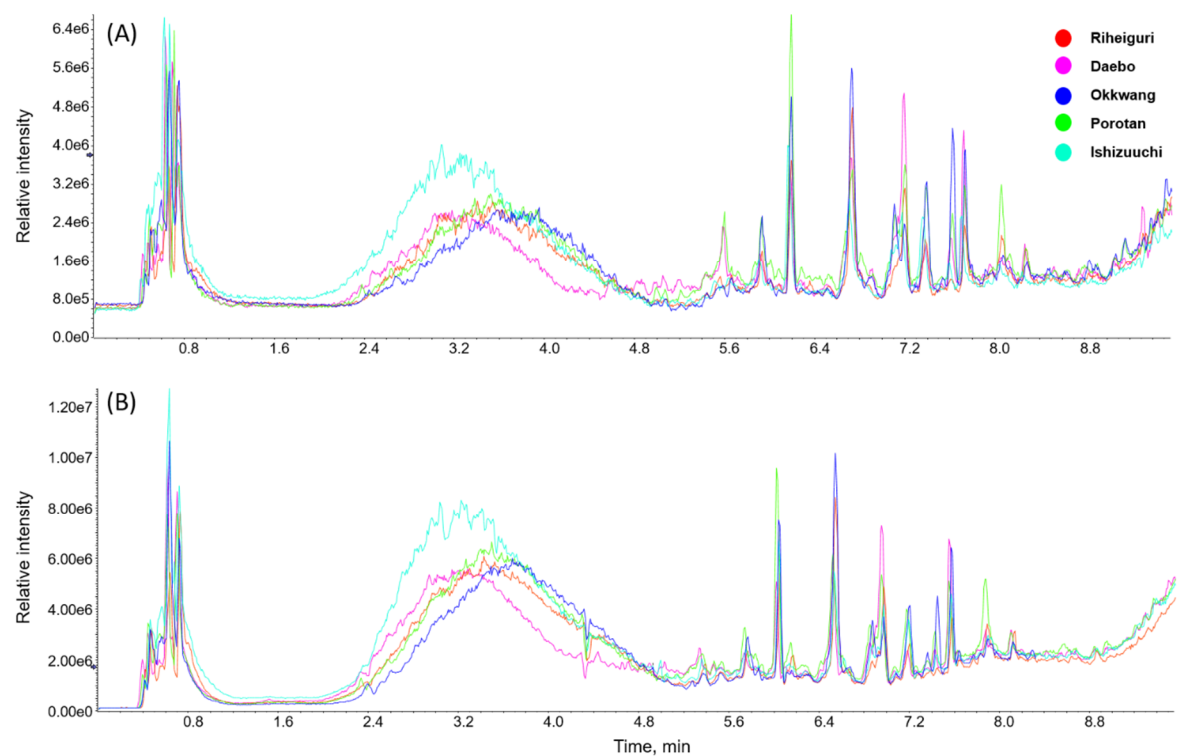

Figure S2. Total ion chromatograms in (A) ESI-positive and (B) ESI-negative modes from UPLC-QTOF/MS of whole *C. crenata* shells .

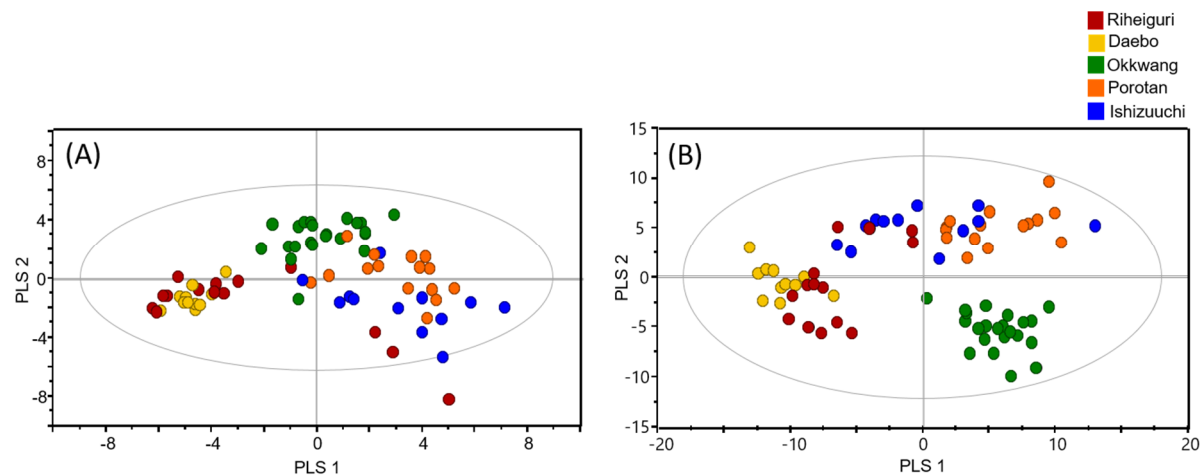

Figure S3. PLS-DA score plot derived from UPLC-QTOF/MS spectra of whole *C. crenata* shells extracts. (A) positive, (B) negative mode.
